# Supplementary material for: Using diphenyleneiodonium to induce a viable but non-culturable phenotype in Mycobacterium tuberculosis and its metabolomics analysis
Source: PLoS One. 2019 Aug 1;14(8):e0220628. doi: 10.1371/journal.pone.0220628 (PMC6675104; doi:10.1371/journal.pone.0220628)
Supplement: S8 Fig — (PDF) [file pone.0220628.s008.pdf]

**S8 Fig. Heat map of altered metabolite of DPI treated mycobacteria at 1<sup>st</sup>, 3<sup>rd</sup>, 5<sup>th</sup> and 9<sup>th</sup> days of treatment**

| <b>A) Nucleotide and nucleoside related</b> |   |   |   |   |
|---------------------------------------------|---|---|---|---|
| Metabolites                                 | 1 | 3 | 5 | 9 |
| dTMP                                        |   |   |   |   |
| -D-ribose-1-phosphate                       |   |   |   |   |
| D-ribulose 5-phosphate                      |   |   |   |   |
| D-xylulose 5-phosphate                      |   |   |   |   |
| IMP                                         |   |   |   |   |
| keto-D-ribose 5-phosphate                   |   |   |   |   |
| UTP                                         |   |   |   |   |
| α-D-ribose-1-phosphate                      |   |   |   |   |
| adenine                                     |   |   |   |   |
| 1-(5-phospho-β-D-ribose)-AMP                |   |   |   |   |
| CMP                                         |   |   |   |   |
| hypoxanthine                                |   |   |   |   |

| <b>B) Amino Acid and precursor</b> |   |   |   |   |
|------------------------------------|---|---|---|---|
| Metabolites                        | 1 | 3 | 5 | 9 |
| L-arginino-succinate               |   |   |   |   |
| D-glutamate                        |   |   |   |   |
| L-asparagine                       |   |   |   |   |
| L-aspartyl-4-phosphate             |   |   |   |   |
| L-cystathionine                    |   |   |   |   |
| L-glutamate                        |   |   |   |   |
| L-lysine                           |   |   |   |   |
| L-phenylalanine                    |   |   |   |   |
| L-rhamnonate                       |   |   |   |   |
| L-γ-glutamylcysteine               |   |   |   |   |
| meso-diaminopimelate               |   |   |   |   |
| L,L-diaminopimelate                |   |   |   |   |
| N-acetylglutaminyglutamine         |   |   |   |   |
| N-acetyl-L-ornithine               |   |   |   |   |
| O-acetyl-L-serine                  |   |   |   |   |
| 2-aminoprop-2-enoate               |   |   |   |   |
| 2-iminobutanoate                   |   |   |   |   |
| (2Z)-2-aminobut-2-enoate           |   |   |   |   |
| indole                             |   |   |   |   |

### C) Organic acid

| Metabolites                                                                    | 1 | 3 | 5 | 9 |
|--------------------------------------------------------------------------------|---|---|---|---|
| fumarate                                                                       |   |   |   |   |
| oxaloacetate                                                                   |   |   |   |   |
| D-threo-isocitrate                                                             |   |   |   |   |
| R)-lactate                                                                     |   |   |   |   |
| succinate                                                                      |   |   |   |   |
| succinate semialdehyde                                                         |   |   |   |   |
| (R)-lactate                                                                    |   |   |   |   |
| (S)-2-acetolactate                                                             |   |   |   |   |
| citrate                                                                        |   |   |   |   |
| (S)-lactate                                                                    |   |   |   |   |
| (S)-malate                                                                     |   |   |   |   |
| cis-vaccenate                                                                  |   |   |   |   |
| (2R,3S)-2-methylisocitrate                                                     |   |   |   |   |
| (2S)-2-phospholactate                                                          |   |   |   |   |
| 3-methyl-2-oxobutanoate                                                        |   |   |   |   |
| (S)-2-aceto-2-hydroxybutanoate                                                 |   |   |   |   |
| (S)-4-hydroxy-2-oxohexanoate                                                   |   |   |   |   |
| (R)-2,3-dihydroxy-3-methylbutanoate                                            |   |   |   |   |
| (S)-3-hydroxy-isobutanoate                                                     |   |   |   |   |
| 2-succinyl-5-enolpyruvyl-6-hydroxy-3-cyclohexene-1-carboxylate                 |   |   |   |   |
| 3-[(3aS,4S,5R,7aS)-5-hydroxy-7a-methyl-1-oxo-octahydro-1H-indene-4-carboxylate |   |   |   |   |
| 2-dehydropantoate                                                              |   |   |   |   |
| 2-oxobutanoate                                                                 |   |   |   |   |
| 8-amino-7-oxononanoate                                                         |   |   |   |   |
| (S)-methylmalonate-semialdehyde                                                |   |   |   |   |
| 5-enolpyruvyl-shikimate 3-phosphate                                            |   |   |   |   |

### E) Lipid and fatty acid

| Metabolites                                   | 1 | 3 | 5 | 9 |
|-----------------------------------------------|---|---|---|---|
| L-1-glycero-3-phosphocholine                  |   |   |   |   |
| octadecanal                                   |   |   |   |   |
| octanoate                                     |   |   |   |   |
| palmitoleate                                  |   |   |   |   |
| phosphocholine                                |   |   |   |   |
| stearate                                      |   |   |   |   |
| 3-oxo-23,24-bisnorcholesterol-4-en-22-oyl-CoA |   |   |   |   |
| 3-oxocholesterol-4-en-26-oyl-CoA              |   |   |   |   |
| 3-oxocholesterol-4-en-26-oyl-CoA              |   |   |   |   |

### D) Sugar

| Metabolites                                                           | 1 | 3 | 5 | 9 |
|-----------------------------------------------------------------------|---|---|---|---|
| inosine                                                               |   |   |   |   |
| chitotriose                                                           |   |   |   |   |
| D-glucosamine 1-phosphate                                             |   |   |   |   |
| D-sedoheptulose 7-phosphate                                           |   |   |   |   |
| dTDP-β-L-rhamnose                                                     |   |   |   |   |
| glycerol                                                              |   |   |   |   |
| sn-glycerol 3-phosphate                                               |   |   |   |   |
| UDP-N-acetyl-α-D-glucosamine                                          |   |   |   |   |
| UDP-α-D-galactose                                                     |   |   |   |   |
| UDP-α-D-glucose                                                       |   |   |   |   |
| α,α-trehalose                                                         |   |   |   |   |
| α-D-glucosamine 6-phosphate                                           |   |   |   |   |
| 3-hydroxy-9,10-secoandrosta-1,3,5(10)-triene-9,17-dione               |   |   |   |   |
| D-erythro-imidazole-glycerol-phosphate                                |   |   |   |   |
| dihydroxyacetone phosphate                                            |   |   |   |   |
| UMP                                                                   |   |   |   |   |
| 3-deoxy-D-arabino-heptulosonate-7-phosphate                           |   |   |   |   |
| 2-O-(6-phospho-α-D-mannosyl)-D-glycerate                              |   |   |   |   |
| 2-O-(α-D-glucopyranosyl)-D-glycerate                                  |   |   |   |   |
| 2-[2-O-(α-D-mannopyranosyl)-α-D-glucopyranosyl]-3-phospho-D-glycerate |   |   |   |   |
| 2-C-methyl-D-erythritol 4-phosphate                                   |   |   |   |   |
| 5,6-dimethylbenzimidazole                                             |   |   |   |   |
| 5-formamido-1-(5-phospho-D-ribose)-imidazole-4-carboxamide            |   |   |   |   |
| 9α-hydroxyandrosta-1,4-diene-3,17-dione                               |   |   |   |   |

### F) Sulfur metabolisms

| Metabolites               | 1 | 3 | 5 | 9 |
|---------------------------|---|---|---|---|
| sulfate                   |   |   |   |   |
| mycothiol                 |   |   |   |   |
| mycothione                |   |   |   |   |
| myo-inositol              |   |   |   |   |
| S-methyl-5'-thioadenosine |   |   |   |   |
| dethiobiotin              |   |   |   |   |
| glutathioselenol          |   |   |   |   |
| L-cystathionine           |   |   |   |   |

### G) Energy metabolisms

| Metabolites                              | 1 | 3 | 5 | 9 |
|------------------------------------------|---|---|---|---|
| NAD+                                     |   |   |   |   |
| nicotinate                               |   |   |   |   |
| MoO <sub>2</sub> -molybdopterin cofactor |   |   |   |   |
| protoporphyrin IX                        |   |   |   |   |
